# Supplementary material
Source: Springer Nature journal article supplement (https://www.springermedizin.de/resource/supplementary/12885_2013_5201_MOESM7_ESM.pdf/9466174)

**E**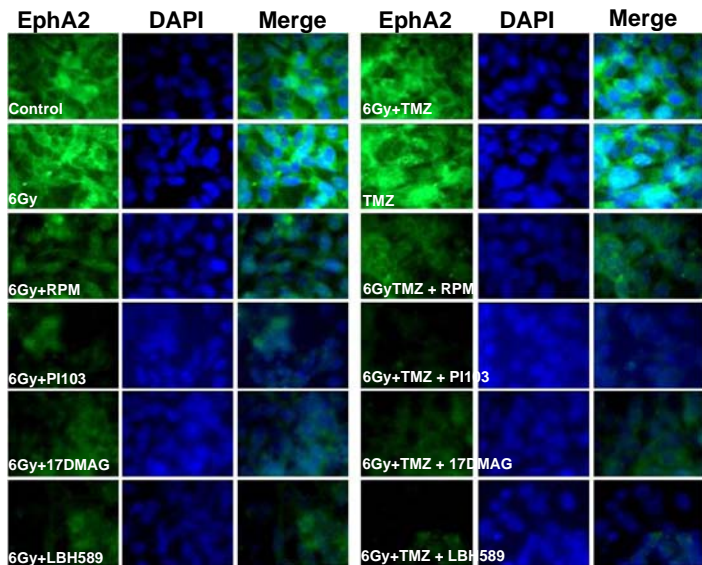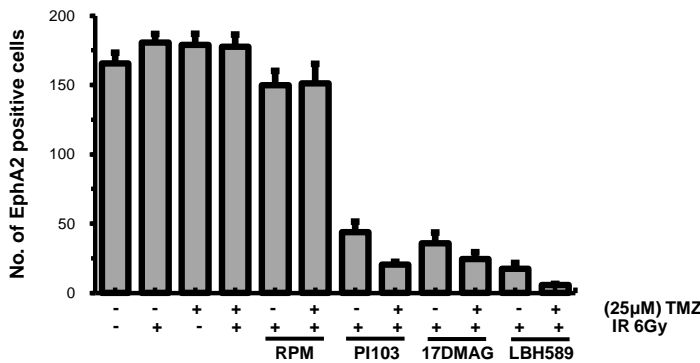

Supplement: MOESM7 [file 9466174]
